# Supplementary material
Source: MDPI journal article supplement (https://www.mdpi.com/2225-1154/9/2/18)
Supplement: s1 [file s1]

## Supplementary Materials

**Table S1: Items Measuring Environmental Concern**

Survey question: To what extent are you concerned about the following situations? *not at all concerned* (1) to *very concerned* (7) (Cronbach's  $\alpha=0.96$ )

| Survey item                       | Mean | Standard deviation |
|-----------------------------------|------|--------------------|
| Coral bleaching                   | 4.22 | 1.78               |
| Plastic in the ocean              | 5.15 | 1.75               |
| Drought                           | 4.43 | 1.75               |
| Heat waves                        | 4.04 | 1.76               |
| Stronger forest fires             | 4.84 | 1.78               |
| Sea level rising                  | 4.07 | 1.80               |
| Ice caps melting                  | 4.08 | 1.86               |
| Vector-borne illnesses            | 4.36 | 1.74               |
| Deforestation                     | 4.77 | 1.76               |
| Habitat destruction               | 4.76 | 1.73               |
| Overpopulation                    | 4.56 | 1.94               |
| Air pollution                     | 4.86 | 1.69               |
| Animal species extinction         | 4.68 | 1.79               |
| Monarch butterfly population loss | 4.14 | 1.77               |
| Bee population loss               | 4.93 | 1.81               |
| Declining water quality           | 4.86 | 1.78               |

**Table S2: Items Measuring Pro-environmental Policy Support**

Survey question: To what degree do you support the following initiatives? *not at all* (1) to *a great deal* (7) (Cronbach's  $\alpha=0.87$ )

| Survey item                                                                | Mean | Standard deviation |
|----------------------------------------------------------------------------|------|--------------------|
| Investment in solar panel farms                                            | 4.14 | 2.34               |
| Investment in wind turbine farms                                           | 4.14 | 2.33               |
| Tax rebates for consumers who install renewable energy systems at home     | 4.42 | 2.29               |
| Expanding offshore drilling*                                               | 3.46 | 2.35               |
| Government regulations for fuel efficiency standards in new cars           | 3.81 | 2.27               |
| Federal regulations for air pollution                                      | 4.27 | 2.23               |
| Federal regulations for water pollution                                    | 4.54 | 2.30               |
| Cutting funding for the EPA*                                               | 3.67 | 2.44               |
| Withdrawing from the Paris Climate Treaty*                                 | 2.84 | 2.50               |
| Cap and trade initiatives to limit CO2 production                          | 2.96 | 2.29               |
| Preservation of the National Parks                                         | 5.17 | 2.23               |
| Public schools teaching about environmental issues in the classroom        | 4.08 | 2.25               |
| Public schools teaching about human caused climate change in the classroom | 3.28 | 2.25               |

\* Items recoded so that higher values indicate more support
